# Supplementary material
Source: publisher figshare collection journal article supplement (https://rs.figshare.com/ndownloader/files/35933392)
Supplement: Supplementary file 1 [file 35933392]

clear % 3D focal curve diffraction vertical section xz plane
load('parameters.mat',  'hsi','Rs', 'Depth','wl', 'n','Asp', 'savef');
f=(n+1)/(2*n)+0.125*n/(n-1)/Asp^2;
thmax=acos((f-1)/(f-1/n));
rmin=f*(n-1)/(n-cos(thmax));
xmax=rmin*sin(thmax); % in 3D xmax=max radius
a=(n+1)/n;b=(n+1)/(n-1);
funz = @(rs) (f-sqrt(f^2-b.*rs.^2))/a;
funinclang = @(rs) atan(b.*rs./(a.*sqrt(f^2-b.*rs.^2))); % for adjusting incident intensity due to incline surface
% cosfactor = @(y,x,yc,xc) sqrt(1-(x-xc).^2./((x-xc).^2+(y-yc).^2));
funR = @(rs, phs, Xscr,L) sqrt((1-funz(rs)+L).^2+(rs.*cos(phs)-Xscr).^2+(rs.*sin(phs)).^2);
funth = @(rs, phs, Xscr,L) atan(sqrt((rs.*cos(phs)-Xscr).^2+(rs.*sin(phs)).^2)./(1-funz(rs)+L));
funphase = @(rs,phs,Xscr,L,wl,phase) rs.*(cos((2*pi./wl).*funz(rs)+(2*pi./wl).*n.*funR(rs, phs, Xscr, L)+phase)+1i*sin((2*pi./wl).*funz(rs)+(2*pi./wl).*n.*funR(rs, phs, Xscr, L)+phase).*cos(0.5*funth(rs, phs, Xscr, L)))./funR(rs, phs, Xscr, L);  % .*cos(0.5*funth(rs, phs, Xscr, L)).*sqrt(cos(funinclang(rs))) point source 2D integration
positionx=zeros(1,101);positiony=zeros(1,101);Int=zeros(1,101);
positionx1=zeros(1,101);positiony1=zeros(1,101);%Int1=zeros(1,101);% Int2=zeros(1,101);Int3=zeros(1,101);Int4=zeros(1,101);
for m=1:101
    radius=(m-51)*xmax/50;positionx1(m)=radius*hsi;
    positiony1(m)=(1-funz(radius))*hsi;
end
hold on;
figure(1); plot(positionx1,positiony1);
wln=round(wl*1000);wlns=num2str(wln);wl=wl/hsi;
savefile = ['data11/sample/focxzwl',wlns , savef, '.dat'];
for j=1:101
    L=(j-1)*Depth/100+0.1;
    for i=1:101
        Xs=(i-51)*Rs/50;
        phase= 0;%-(2*pi/wl)*n*(1+L);xmax2=2*xmax/3;xmax1=xmax/3;
       % amp1=integral (@(rs) funphase(rs,phs,Xs, L,wl,phase),0,xmax,'method','iterated','RelTol',1e-6,'AbsTol',0);%*cos(theda); % integration
      %  amp2=integral2 (@(rs, phs) funphase(rs,phs,Xs, L,wl,phase),0,xmax2,-pi,pi,'RelTol',1e-3,'AbsTol',1e-3);
      %  amp3=integral2 (@(rs, phs) funphase(rs,phs,Xs, L,wl,phase),0,xmax,-pi,pi,'RelTol',1e-3,'AbsTol',1e-3);
        amp=integral2 (@(rs, phs) funphase(rs,phs,Xs, L,wl,phase),0,xmax,-pi,pi,'method','iterated','RelTol',1e-6,'AbsTol',0);
        Int(i)=abs(amp)^2; % Int1(i)=abs(amp1)^2;% Int3(i)=abs(amp3)^2;
        positiony(i)=(1+L)*hsi;positionx(i)=Xs*hsi;
    end
    data=[positionx', positiony',Int'];
    if j==1
        save(savefile, 'data','-ascii','-tabs');
    else
        save(savefile, 'data','-ascii','-tabs','-append');
    end
end
